# Supplementary figures and images for: Ruthenium complexes of 2-(2′-pyridyl)benzimidazole as photosensitizers for dye-sensitized solar cellsElectronic supplementary information (ESI) available: details of the luminescence measurements and solar cell construction and testing; synthesis details; 1H–1H COSY and NOESY 2D spectra for [(bpy)2Ru(pbimH)](PF6)2. See http://www.rsc.org/suppdata/dt/b2/b208289f/
Source: Royal Society of Chemistry journal article supplement (doi:10.1039/b208289f), 2003-01-13

**Fig. S1**  $^1\text{H}$ - $^1\text{H}$  COSY of  $[(\text{bpy})_2\text{Ru}(\text{pbimH})](\text{PF}_6)_2$  in MeCN

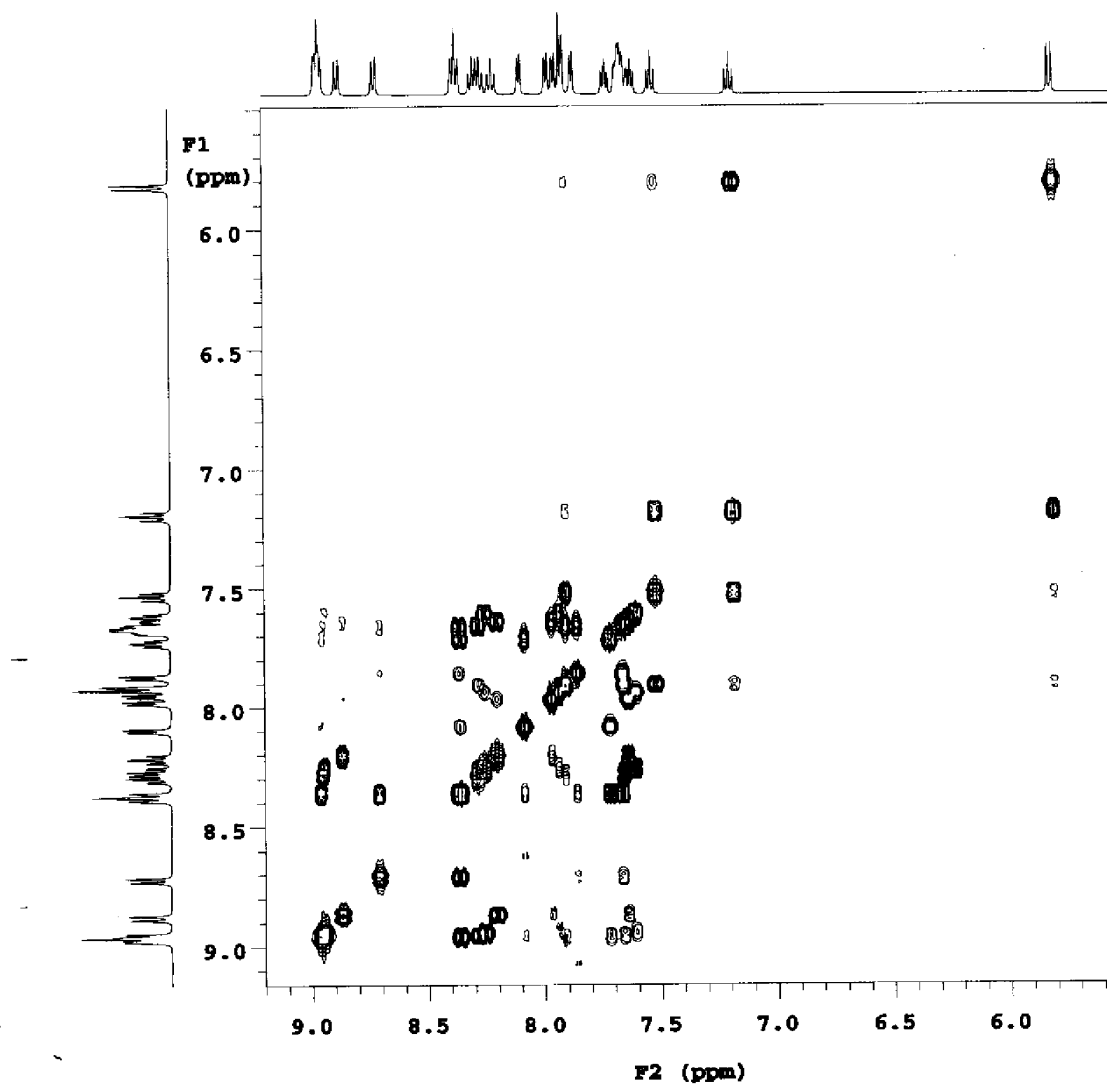

Supplement: figs1.pdf [file figs1.pdf]

**Fig. S2**  $^1\text{H}$ - $^1\text{H}$  NOESY of  $[(\text{bpy})_2\text{Ru}(\text{pbimH})](\text{PF}_6)_2$  in MeCN

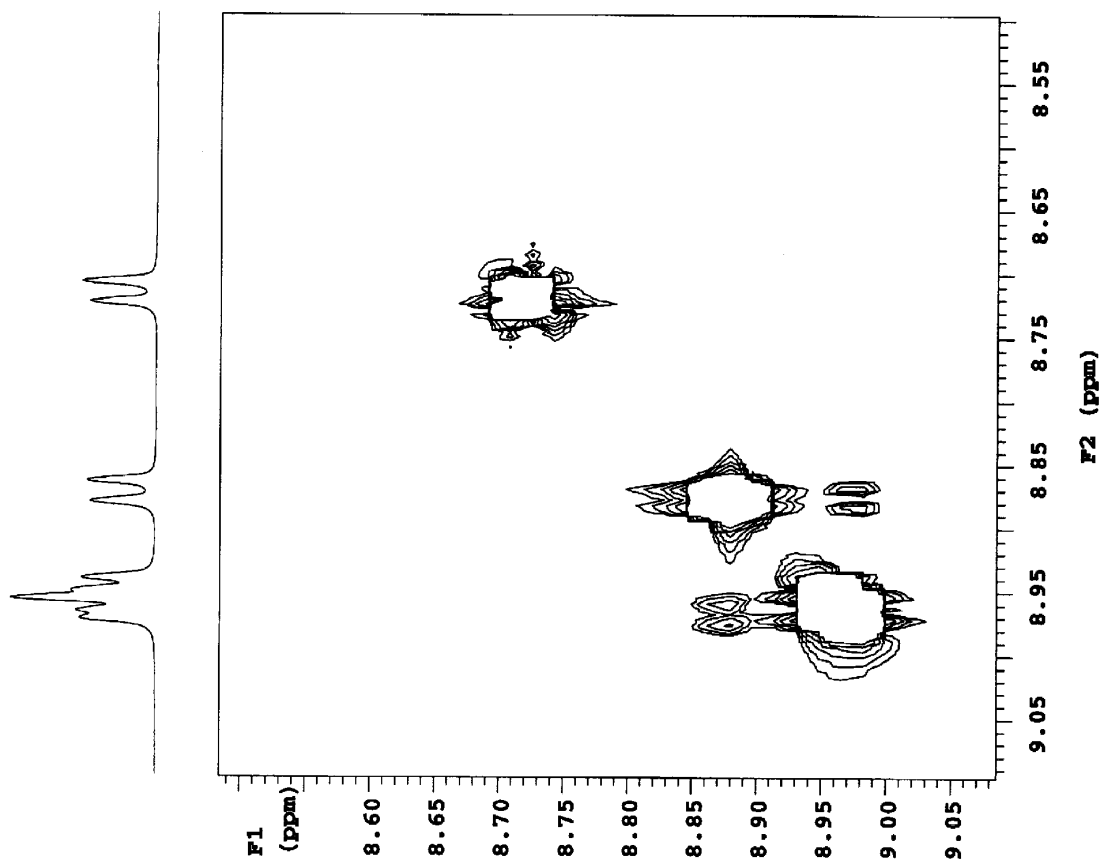

Supplement: figs2.pdf [file figs2.pdf]
